# Supplementary material
Source: PubMed Central journal article supplement (PMC123637)

37 °C

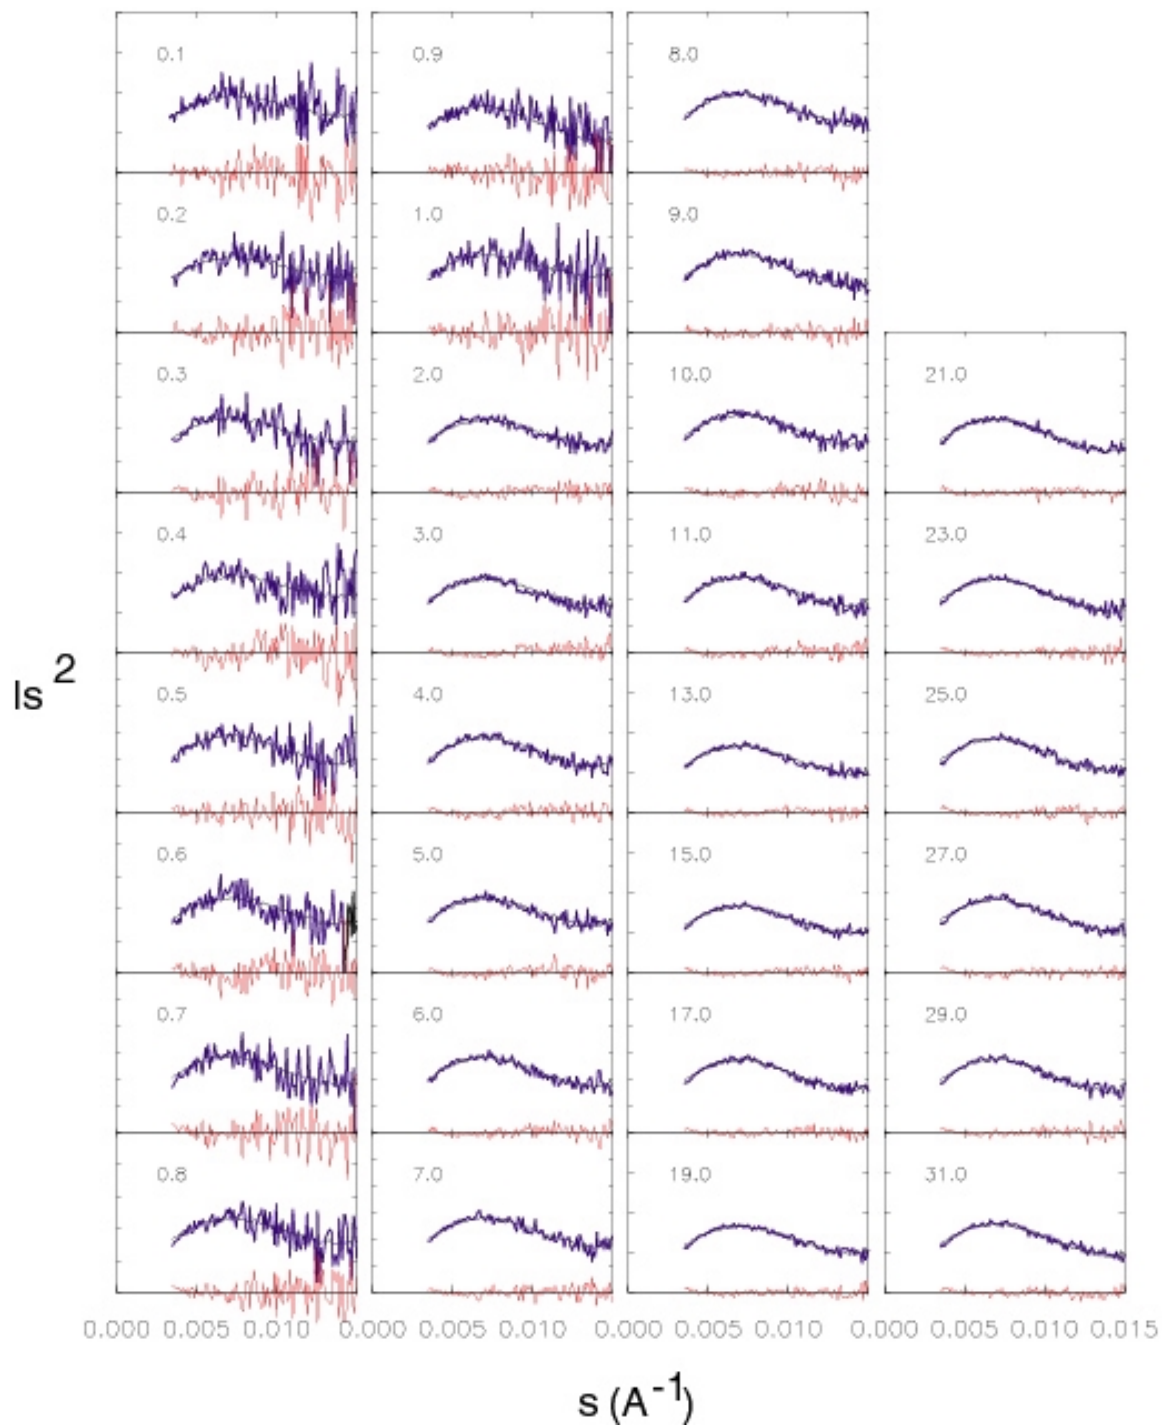

15 °C

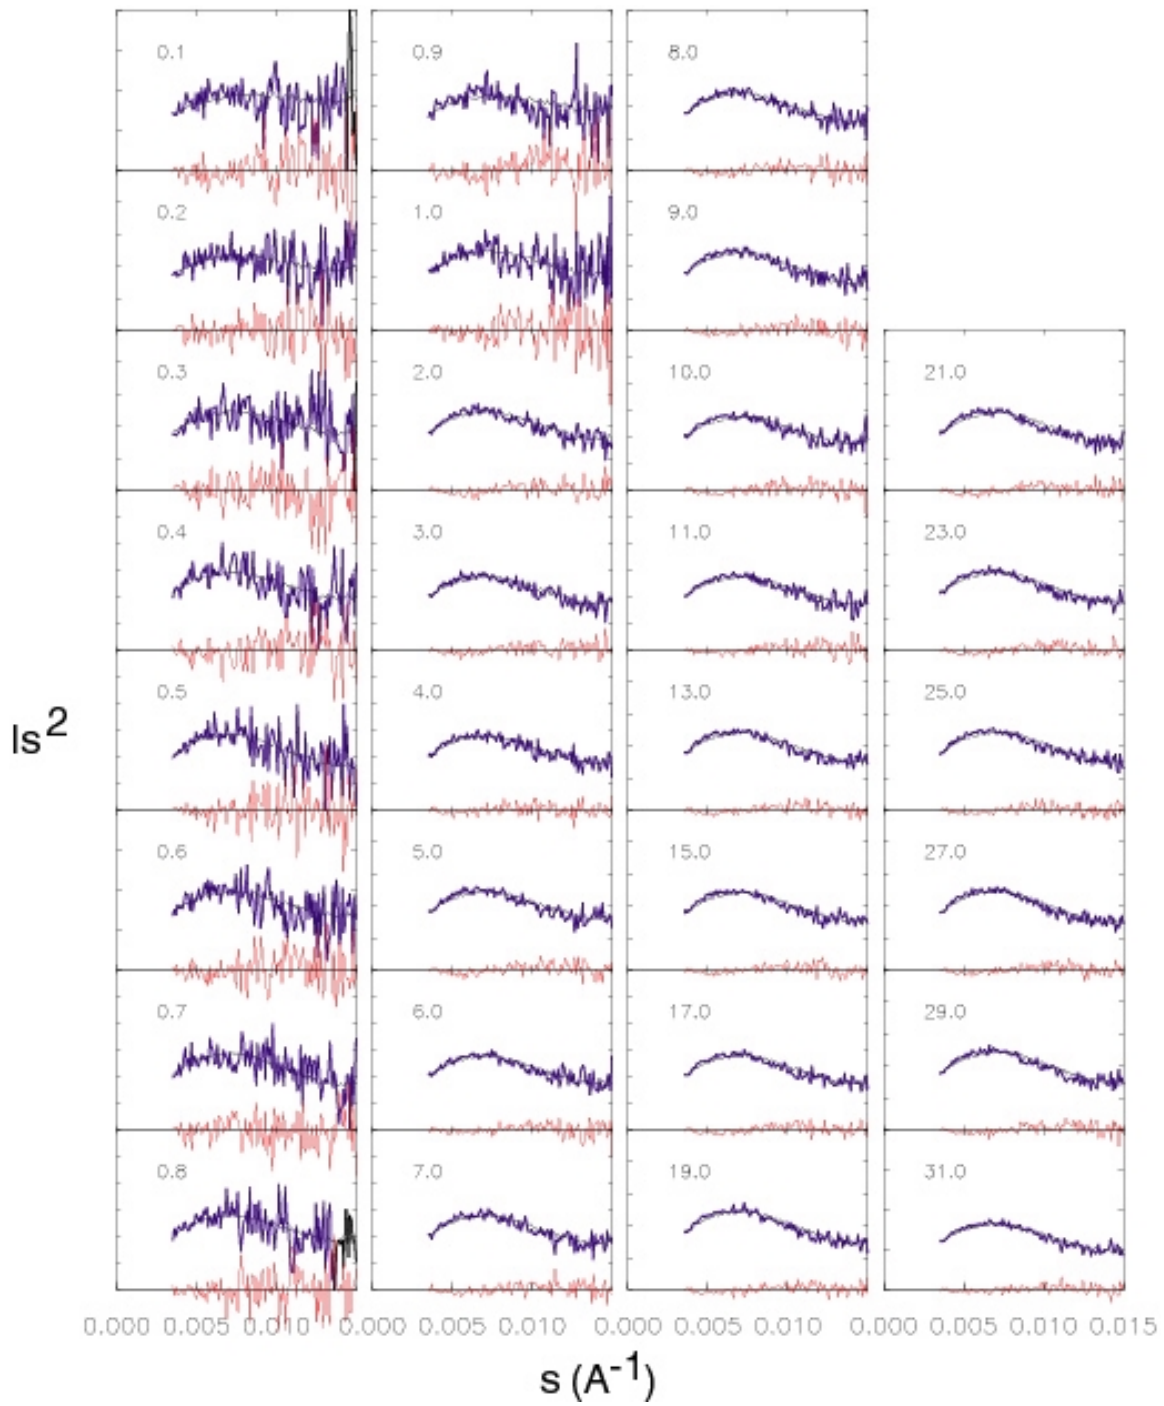

15 °C

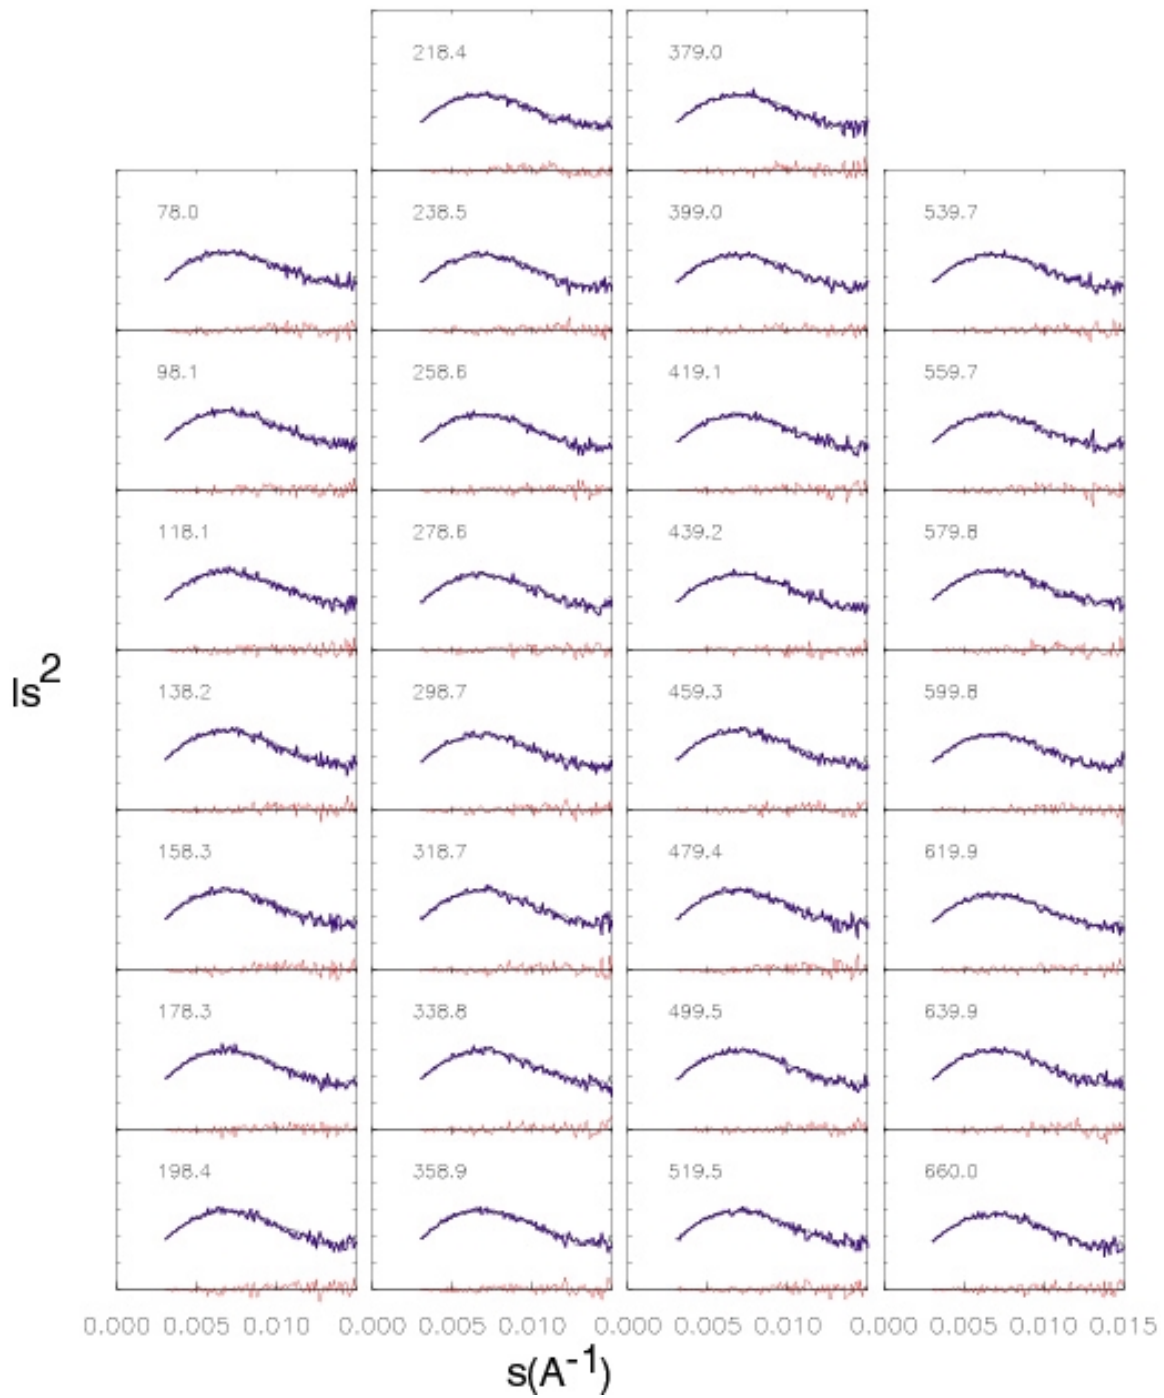

15 °C

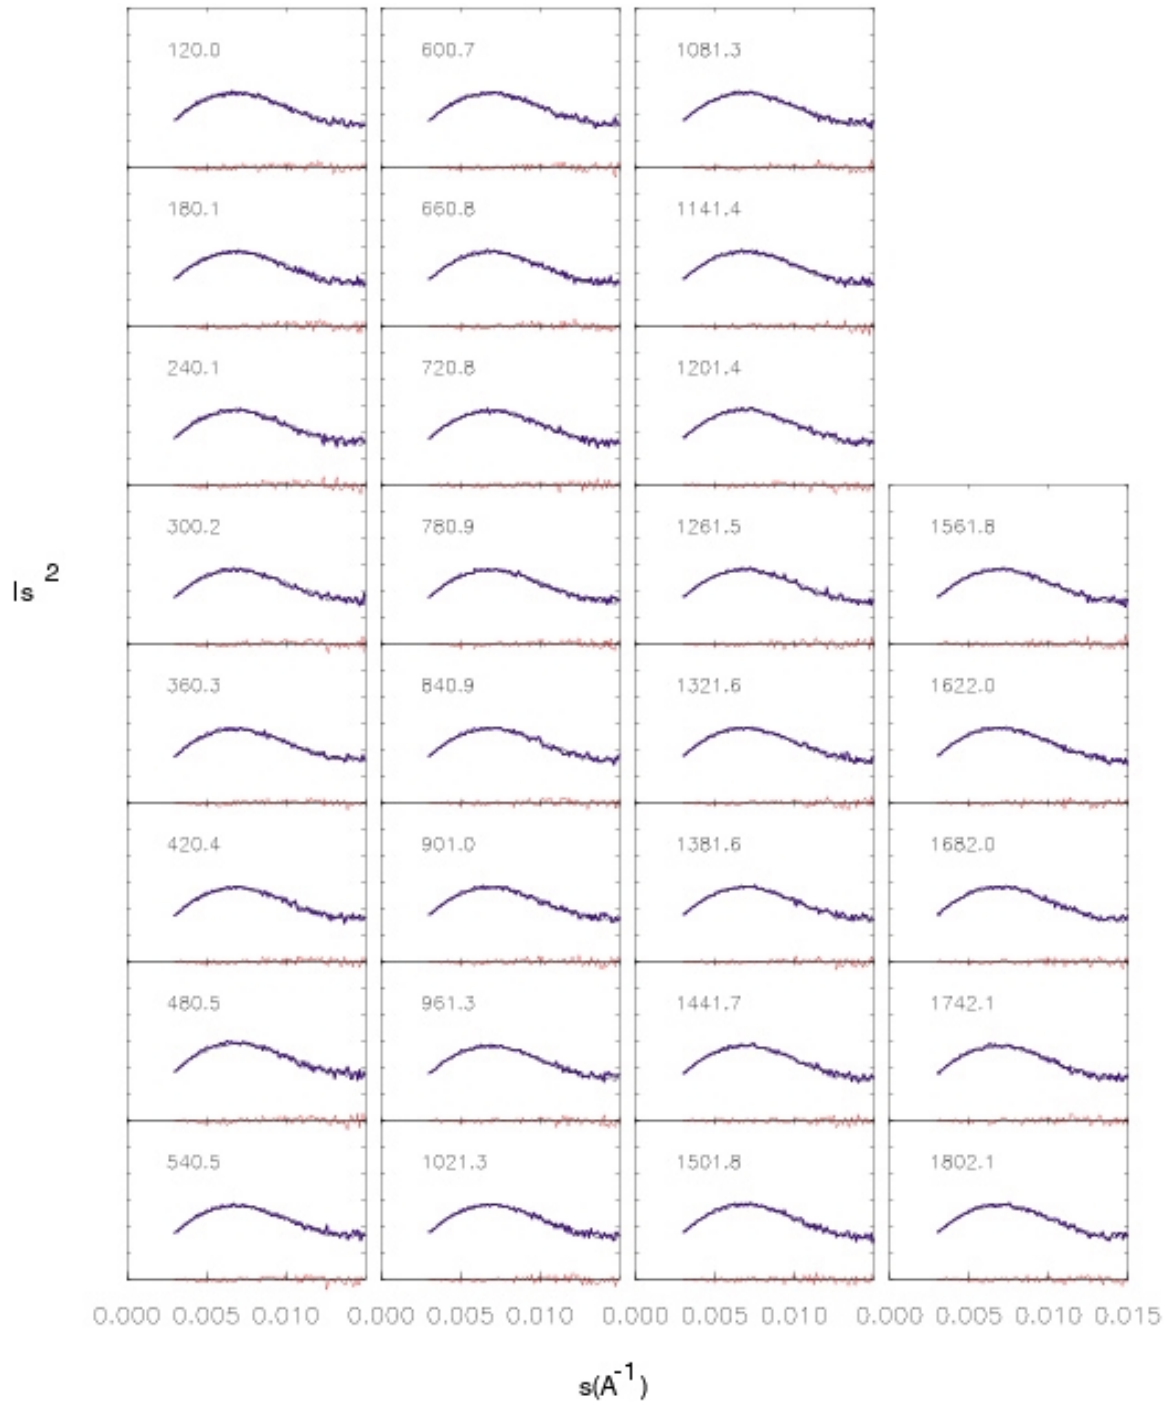

37 °C

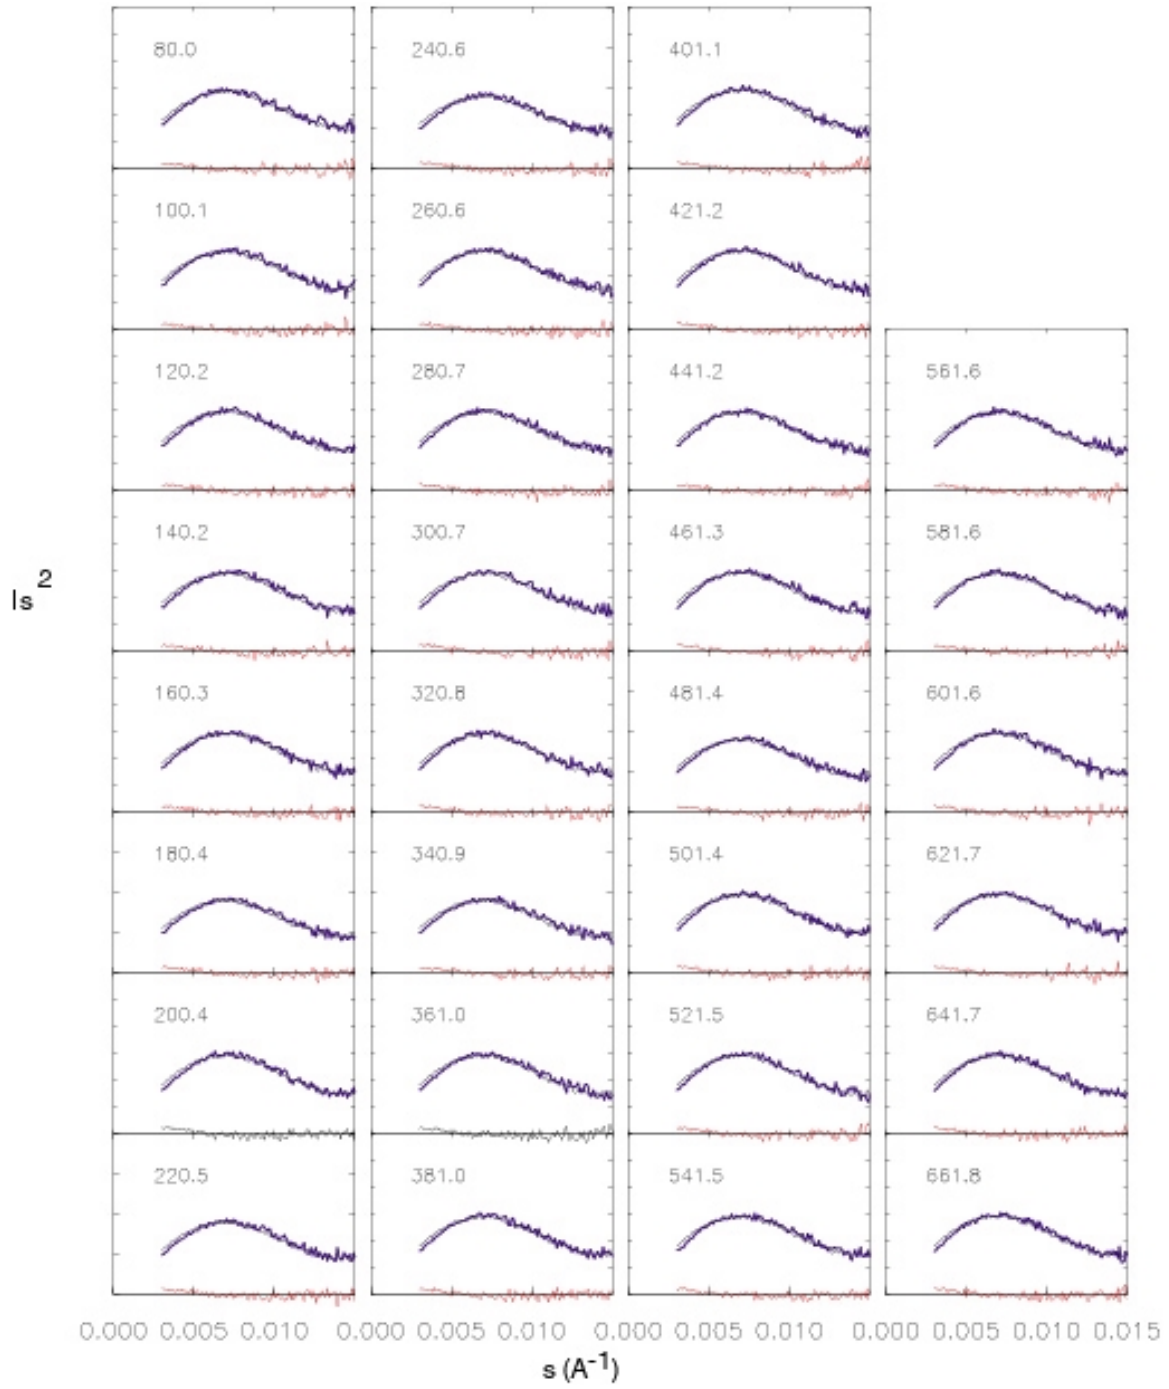

25 °C

$Is^2$

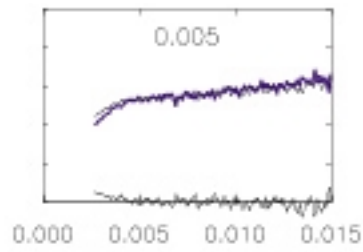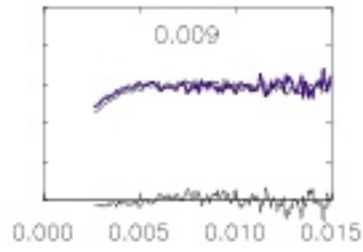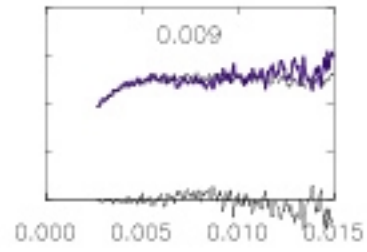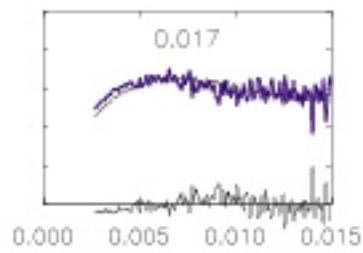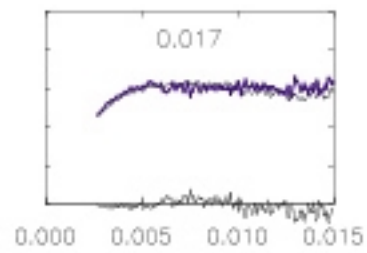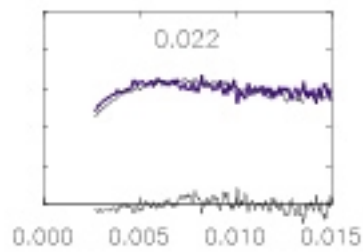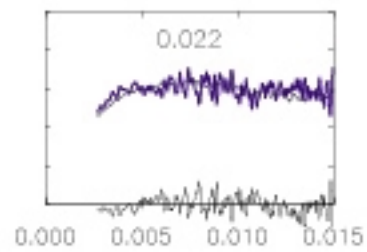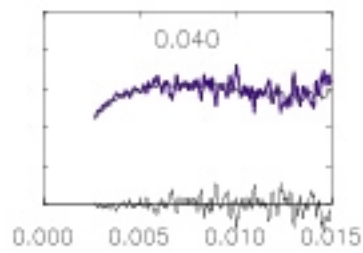

$S (A^{-1})$

Supplement: pnas_99_7_4266__3.pdf [file pnas_99_7_4266__3.pdf]
